# Supplementary material
Source: PubMed Central journal article supplement (PMC6866660)
Supplement: NIHMS1541217-supplement-125_2019_4998_MOESM1_ESM.pdf [file NIHMS1541217-supplement-125_2019_4998_MOESM1_ESM.pdf]

ESM Fig. 1

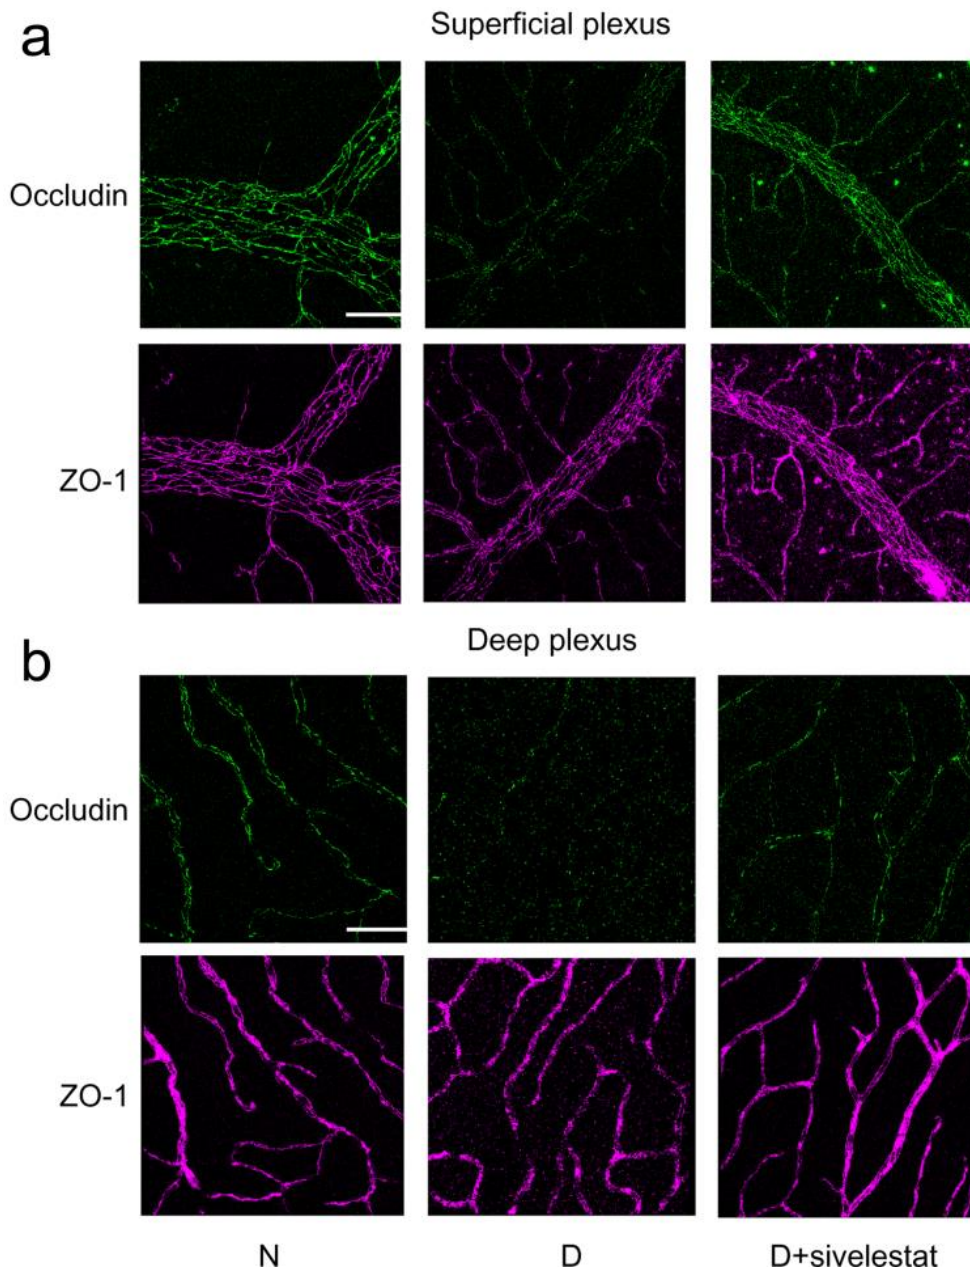

**ESM Figure 1. Qualitative evaluation of tight junction proteins after inhibition of NE in diabetic mice**

Retina whole mount samples collected from control, diabetic and sivelestat-treated mice were stained with occluding and ZO-1. Images were taken from retinal superficial (a) and deep plexus (b). High glucose exposure has a detrimental effect in the distribution of tight junction proteins at the blood-retinal barrier (a, b middle panels). Such negative effect is subtle or not seen in diabetic animals after administration of sivelestat (a, b right panels). Scale bar length: 60 $\mu$ m.
